# Supplementary material for: Natural Variation at the FRD3 MATE Transporter Locus Reveals Cross-Talk between Fe Homeostasis and Zn Tolerance in Arabidopsis thaliana
Source: PubMed Central journal article supplement (PMC3516540; doi:10.1371/journal.pgen.1003120), 2012-12-06
Supplement: pgen.1003120.s002.pdf [file pgen.1003120.s002.pdf]

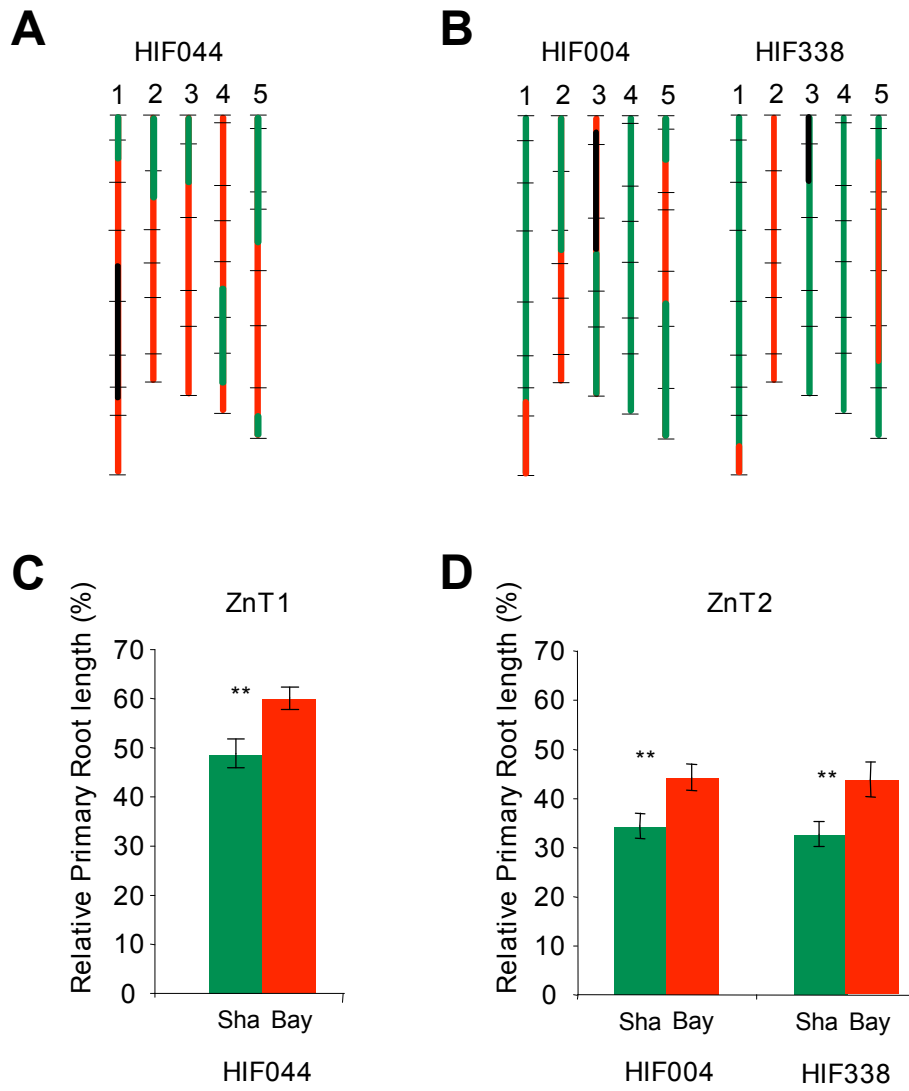

Figure S2
