# Supplementary material for: Natural Variation at the FRD3 MATE Transporter Locus Reveals Cross-Talk between Fe Homeostasis and Zn Tolerance in Arabidopsis thaliana
Source: PubMed Central journal article supplement (PMC3516540; doi:10.1371/journal.pgen.1003120), 2012-12-06
Supplement: pgen.1003120.s006.pdf [file pgen.1003120.s006.pdf]

FRD3\_COL TGACGTTGATGGCTTGA AAAAGATGGCCTTATCTTGC GGAACAAACAATT  
FRD3\_BAY TGACGTTGATGGCTTGA AAAAGATGGCCTTATCTTGC GGAACAAACAATT  
FRD3\_SHA TGACGTTGATGGCTTGA AAAAGATGGCCTTATCTTGC GGAACAAACAATT

FRD3\_COL ACATACACGACACCGCCTATATACAACTCACCTGTGTTGGTCTCTGTTC  
FRD3\_BAY ACATACACGACACCGCCTATATACAACTCACCTGTGTTGGTCTCTGTTC  
FRD3\_SHA ACATACACGACACCGCCTATATACAACTCACCTGTGTTGGTCTCTGTTC

FRD3\_COL CATCTTTTATGTTATTTGTTTTCCGACTGTGCCTTCCCTTAACTAATATT  
FRD3\_BAY CATCTTTTATGTTATTTGTTTTCCGACTGTGCCTTCCCTTAACTAATATT  
FRD3\_SHA CATCTTTTATGTTATTTGTTTTCCGACTGTGCCTTCCCTTAACTAATATT

FRD3\_COL ATAATTTTAAAGATGTTTCATAAATCACAGTAGAAAGCTTGTTTTGTCTAA  
FRD3\_BAY ATAATTTTAAAGATGTTTCATAAATCACAGTAGAAAGCTTGTTTTGTCTAA  
FRD3\_SHA ATAATTTTAAAGATGTTTCATAAATCACAGTAGAAAGCTTGTTTTGTCTAA

FRD3\_COL AATGAACATGACACGGATCATACAAAAATATATTTTACACTATAGCTAT  
FRD3\_BAY AATGAACATGACACGGATCATACAAAAATATATTTTACACTATAGCTAT  
FRD3\_SHA AATGAACATGACACGGATCATACAAAAATATATTTTACACTATAGCTAT

FRD3\_COL ATACCGATTTAATCTTAGTACTTTGAATCGTCTAAAAC TAAACGGCCT  
FRD3\_BAY ATACCGATTTAATCTTAGTACTTTGAATCGTCTAAAAC TAAACGGCCT  
FRD3\_SHA ATACCGATTTAATCTTAGTACTTTGAATCGTCTAAAAC TAAACGGCCT

FRD3\_COL TCTCAAAACCCCTCCCTCTTTTCCCTCCCTCAGAAACCCCTCCATCGA  
FRD3\_BAY TCTCAAAACCCCTCCCTCTTTTCCCTCCCTCAGAAACCCCTCCATCGA  
FRD3\_SHA TCTCAAAACCCCTCCCTCTTTTCCCTCCCTCAGAAACCCCTCCATCGA

FRD3\_COL CAAATAACGTTATGCAATTTCTTAAACAATGCTCGACAAGCATGTGTTTT  
FRD3\_BAY CAAATAACGTTATGCAATTTCTTAAACAATGCTCGACAAGCATGTGTTTT  
FRD3\_SHA CAAATAACGTTATGCAATTTCTTAAACAATGCTCGACAAGCATGTGTTTT

FRD3\_COL TAGTAATGCTACAACCTTATTTCTCTTTTCAACGCTTAAAGAGCATCAAA  
FRD3\_BAY TAGTAATGCTACAACCTTATTTCTCTTTTCAACGCTTAAAGAGCATCAAA  
FRD3\_SHA TAGTAATGCTACAACCTTATTTCTCTTTTCAACGCTTAAAGAGCATCAAA

FRD3\_COL AAGATCAAAGATCTTGGAACCGAGGCTTATGCAAGGAATCATTATAAAG  
FRD3\_BAY AAGATCAAAGATCTTGGAACCGAGGCTTATGCAAGGAATCATTATAAAG  
FRD3\_SHA AAGATCAAAGATCTTGGAACCGAGGCTTATGCAAGGAATCATTATAAAG

FRD3\_COL TACCATGTTATTTTTTAAATAACATCGTTTCTTAATATAATTTATAAA  
FRD3\_BAY TACCATGTTATTTTTTAAATAACATCGTTTCTTAATATAATTTATAAA  
FRD3\_SHA TACCATGTTATTTTTTAAATAACATCGTTTCTTAATATAATTTATAAA

FRD3\_COL TACCGTTATTTTTTACCGAAATTTTCATATATATGTCAGTTTATACTTTGT  
FRD3\_BAY TACCGTTATTTTTTACCGAAATTTTCATATATATGTCAGTTTATACTTTGT  
FRD3\_SHA TACCGTTATTTTTTACCGAAATTTTCATATATATGTCAGTTTATACTTTGT

FRD3\_COL ACGATAACGCCAAAAAATTTAATTTATCGCCAAAAATGTAAACGGTATTTT  
FRD3\_BAY ACGATAACGCCAAAAAATTTAATTTATCGCCAAAAATGTAAACGGTATTTT  
FRD3\_SHA ACGATAACGCCAAAAAATTTAATTTATCGCCAAAAATGTAAACGGTATTTT

FRD3\_COL CGTCGTTAGTTATTTTACCAAAAATAAATGACGATGCAACTTATTTAG  
FRD3\_BAY CGTCGTTAGTTATTTTACCAAAAATAAATGACGATGCAACTTATTTAG  
FRD3\_SHA CGTCGTTAGTTATTTTACCAAAAATAAATGACGATGCAACTTATTTAG

FRD3\_COL TTA AAAATACAAAAAATAAATAATTAATGAGCGGACGGAAATTTTTT  
FRD3\_BAY TTA AAAATACAAAAAATAAATAATTAATGAGCGGACGGAAATTTTTT  
FRD3\_SHA TTA AAAATACAAAAAATAAATAATTAATGAGCGGACGGAAATTTTTT

FRD3\_COL TCCAAAATCCCGATGTGTAATATGAGAACGTTTCGAGGATAACTTACAA  
FRD3\_BAY TCCAAAATCCCGATGTGTAATATGAGAACGTTTCGAGGATAACTTACAA  
FRD3\_SHA TCCAAAATCCCGATGTGTAATATGAGAACGTTTCGAGGATAACTTACAA

FRD3\_COL ATTA AACATTAATAAAAATGATAAAGTGTAGTTAGGAGCTAAATTTGTGAT  
FRD3\_BAY ATTA AACATTAATAAAAATGATAAAGTGTAGTTAGGAGCTAAATTTGTGAT  
FRD3\_SHA ATTA AACATTAATAAAAATGATAAAGTGTAGTTAGGAGCTAAATTTGTGAT

FRD3\_COL AGTA AACATCTATCTCTAATATTTAATAAATGAATATAATACTATTTTTAA  
FRD3\_BAY AGTA AACATCTATCTCTAATATTTAATAAATGAATATAATACTATTTTTAA  
FRD3\_SHA AGTA AACATCTATCTCTAATATTTAATAAATGAATATAATACTATTTTTAA

FRD3\_COL TCATAGTATTAATAATTTCTTTAATAAATAAATAAATAATTTCAATTTAAT  
FRD3\_BAY TCATAGTATTAATAATTTCTTTAATAAATAAATAAATAATTTCAATTTAAT  
FRD3\_SHA TCATAGTATTAATAATTTCTTTAATAAATAAATAAATAATTTCAATTTAAT

FRD3\_COL TCTATACCAAATTAACCCGAAAAATTTTATCTAACATACACAAAGACAC  
FRD3\_BAY TCTATACCAAATTAACCCGAAAAATTTTATCTAACATACACAAAGACAC  
FRD3\_SHA TCTATACCAAATTAACCCGAAAAATTTTATCTAACATACACAAAGACAC

FRD3\_COL ATAAAAGTTTTGATAACTGCCTAAAAAATAAGCTTTTGAATTTAATTAAT  
FRD3\_BAY ATAAAAGTTTTGATAACTGCCTAAAAAATAAGCTTTTGAATTTAATTAAT  
FRD3\_SHA ATAAAAGTTTTGATAACTGCCTAAAAAATAAGCTTTTGAATTTAATTAAT

FRD3\_COL AGTTGTTATTTCAATGATAAAAATACATATTTTGTCAACTAGTGAATTTCCA  
FRD3\_BAY AGTTGTTATTTCAATGATAAAAATACATATTTTGTCAACTAGTGAATTTCCA  
FRD3\_SHA AGTTGTTATTTCAATGATAAAAATACATATTTTGTCAACTAGTGAATTTCCA

FRD3\_COL ATTACGCAAAATGATTCACCTTTTTAGTGGAAAAATCAAAAGAAAAATGA  
FRD3\_BAY ATTACGCAAAATGATTCACCTTTTTAGTGGAAAAATCAAAAGAAAAATGA  
FRD3\_SHA ATTACGCAAAATGATTCACCTTTTTAGTGGAAAAATCAAAAGAAAAATGA

FRD3\_COL GAAGTTTATATGAAAATAAATCTTTTCCCACTATGATGAATACATGTAAG  
FRD3\_BAY GAAGTTTATATGAAAATAAATCTTTTCCCACTATGATGAATACATGTAAG  
FRD3\_SHA GAAGTTTATATGAAAATAAATCTTTTCCCACTATGATGAATACATGTAAG

FRD3\_COL AAAA CTTTCAATGAAAAGAAAACTTATTTACTCAATATAAAAAATAGAAGAC  
FRD3\_BAY AAAA CTTTCAATGAAAAGAAAACTTATTTACTCAATATAAAAAATAGAAGAC  
FRD3\_SHA AAAA CTTTCAATGAAAAGAAAACTTATTTACTCAATATAAAAAATAGAAGAC

FRD3\_COL TCTTTATCTTTTACGAGTAAAAGTTTCAGCAAAAACCATATTTTCTTATTTGA  
FRD3\_BAY TCTTTATCTTTTACGAGTAAAAGTTTCAGCAAAAACCATATTTTCTTATTTGA  
FRD3\_SHA TCTTTATCTTTTACGAGTAAAAGTTTCAGCAAAAACCATATTTTCTTATTTGA

FRD3\_COL TTA AAAGAAATCATAGAAGTTAAAATAATCAACAAGGGCAAGCCAAAAAAT  
FRD3\_BAY TTA AAAGAAATCATAGAAGTTAAAATAATCAACAAGGGCAAGCCAAAAAAT  
FRD3\_SHA TTA AAAGAAATCATAGAAGTTAAAATAATCAACAAGGGCAAGCCAAAAAAT

FRD3\_COL TCTAGTGTGGGATTTACTTAATAGAAGTATATATATTACGATGTTTATGC  
FRD3\_BAY TCTAGTGTGGGATTTACTTAATAGAAGTATATATATTACGATGTTTATGC  
FRD3\_SHA TCTAGTGTGGGATTTACTTAATAGAAGTATATATATTACGATGTTTATGC

FRD3\_COL GTACCTATTTTCCCTCAATGAGAAGAAAAATCCATAATATTGGTGTCTT  
FRD3\_BAY GTACCTATTTTCCCTCAATGAGAAGAAAAATCCATAATATTGGTGTCTT  
FRD3\_SHA GTACCTATTTTCCCTCAATGAGAAGAAAAATCCATAATATTGGTGTCTT

FRD3\_COL AAGTTTGGACGGAATAAAGAGCAGCAAAAAAGTTAGGGAAGGAAACCTT  
FRD3\_BAY AAGTTTGGACGGAATAAAGAGCAGCAAAAAAGTTAGGGAAGGAAACCTT  
FRD3\_SHA AAGTTTGGACGGAATAAAGAGCAGCAAAAAAGTTAGGGAAGGAAACCTT

FRD3\_COL TGTTTTCTTCAATAATATAGAAAAATAATTTCTTTTATTG--ATTAGAT  
FRD3\_BAY TGTTTTCTTCAATAATATAGAAAAATAATTTCTTTTATTG--ATTAGAT  
FRD3\_SHA TGTTTTCTTCAATAATATAGAAAAATAATTTCTTTTATTG--ATTAGAT

FRD3\_COL ATTA AAATAAGCAAAGATATGCATGCTCATTACGTGCTATAAATAAAAAAC  
FRD3\_BAY ATTA AAATAAGCAAAGATATGCATGCTCATTACGTGCTATAAATAAAAAAC  
FRD3\_SHA ATTA AAATAAGCAAAGATATGCATGCTCATTACGTGCTATAAATAAAAAAC

FRD3\_COL ACGTTTGTACATAGCATCTACTATAAACGTTCTTTTGGCTTCCCGGATTC  
FRD3\_BAY ACGTTTGTACATAGCATCTACTATAAACGTTCTTTTGGCTTCCCGGATTC  
FRD3\_SHA ACGTTTGTACATAGCATCTACTATAAACGTTCTTTTGGCTTCCCGGATTC

FRD3\_COL TTCGAAAACACTTATTGATATCTTCAGACACAACAAATTAATTACAGAGAC  
FRD3\_BAY TTCGAAAACACTTATTGATATCTTCAGACACAACAAATTAATTACAGAGAC  
FRD3\_SHA TTCGAAAACACTTATTGATATCTTCAGACACAACAAATTAATTACAGAGAC

FRD3\_COL AGTTACAGAGGAAAAAGATCTATGACGGAACCTGGTATGATCTTGTCTAC  
FRD3\_BAY AGTTACAGAGGAAAAAGATCTATGACGGAACCTGGTATGATCTTGTCTAC  
FRD3\_SHA AGTTACAGAGGAAAAAGATCTATGACGGAACCTGGTATGATCTTGTCTAC

FRD3\_COL GGTGAAGAAGCAATCCCATTTCTCGTTATCTTCAAAGATTTAAGGTGTG  
FRD3\_BAY GGTGAAGAAGCAATCCCATTTCTCGTTATCTTCAAAGATTTAAGGTGTG  
FRD3\_SHA GGTGAAGAAGCAATCCCATTTCTCGTTATCTTCAAAGATTTAAGGTGTG

FRD3\_COL TGTTTATGTATTTCAATGAAATGGTATGAAATTTTGAAGAAGTATGATCA  
FRD3\_BAY TGTTTATGTATTTCAATGAAATGGTATGAAATTTTGAAGAAGTATGATCA  
FRD3\_SHA TGTTTATGTATTTCAATGAAATGGTATGAAATTTTGAAGAAGTATGATCA

FRD3\_COL TAACATTAGTTTATTTATGTA AAAATGTCAGACATGATTTAGTAGGGACA  
FRD3\_BAY TAACATTAGTTTATTTATGTA AAAATGTCAGACATGATTTAGTAGGGACA  
FRD3\_SHA TAACATTAGTTTATTTATGTA AAAATGTCAGACATGATTTAGTAGGGACA

FRD3\_COL CAACTGGGCGAGAGATTTAGGCAATCCGCTTTCAGCAGCTTTGGCTTTA  
FRD3\_BAY CAACTGGGCGAGAGATTTAGGCAATCCGCTTTCAGCAGCTTTGGCTTTA  
FRD3\_SHA CAACTGGGCGAGAGATTTAGGCAATCCGCTTTCAGCAGCTTTGGCTTTA

FRD3\_COL GCTGCTGATCCAACTCGCTTCTCTGATTGATACCCGCTTTTGTGGGGCTTT  
FRD3\_BAY GCTGCTGATCCAACTCGCTTCTCTGATTGATACCCGCTTTTGTGGGGCTTT  
FRD3\_SHA GCTGCTGATCCAACTCGCTTCTCTGATTGATACCCGCTTTTGTGGGGCTTT

FRD3\_COL AGGAGCGGTTGAGCTAGCGGGGGTGGAGTTTCCATTGCCATATTTCAATC  
FRD3\_BAY AGGAGCGGTTGAGCTAGCGGGGGTGGAGTTTCCATTGCCATATTTCAATC  
FRD3\_SHA AGGAGCGGTTGAGCTAGCGGGGGTGGAGTTTCCATTGCCATATTTCAATC

FRD3\_COL AAGCTTCTAGAATTTACGATATTTCCCACTTGTGAGCCTCAACAATTTCAAT  
FRD3\_BAY AAGCTTCTAGAATTTACGATATTTCCCACTTGTGAGCCTCAACAATTTCAAT  
FRD3\_SHA AAGCTTCTAGAATTTACGATATTTCCCACTTGTGAGCCTCAACAATTTCAAT

FRD3\_COL GTGGCAGAGGAAGACACCGATGGAGAAGATGAAAGAAAGCAAAACAAAGC  
FRD3\_BAY GTGGCAGAGGAAGACACCGATGGAGAAGATGAAAGAAAGCAAAACAAAGC  
FRD3\_SHA GTGGCAGAGGAAGACACCGATGGAGAAGATGAAAGAAAGCAAAACAAAGC

FRD3\_COL CAATCTTCTTACGAGAACTATACCTTGTCTCAAGATTTCTTTGGAAAAGG  
FRD3\_BAY CAATCTTCTTACGAGAACTATACCTTGTCTCAAGATTTCTTTGGAAAAGG  
FRD3\_SHA CAATCTTCTTACGAGAACTATACCTTGTCTCAAGATTTCTTTGGAAAAGG

FRD3\_COL GCATTTCTTACCCTACAAGTAAAGATACCAACACGAGCACAGCAACCTCCA  
FRD3\_BAY GCATTTCTTACCCTACAAGTAAAGATACCAACACGAGCACAGCAACCTCCA  
FRD3\_SHA GCATTTCTTACCCTACAAGTAAAGATACCAACACGAGCACAGCAACCTCCA

FRD3\_COL GGTAAATCCGCATATCTCACTCGACATGATAACTTTTATAAAGTTTC  
FRD3\_BAY GGTAAATCCGCATATCTCACTCGACATGATAACTTTTATAAAGTTTC  
FRD3\_SHA GGTAAATCCGCATATCTCACTCGACATGATAACTTTTATAAAGTTTC

FRD3\_COL GATTGTTTTTTTACTGTTGGTTTCTTCTCTCGATCTTTTGTTTCAAT  
FRD3\_BAY GATTGTTTTTTTACTGTTGGTTTCTTCTCTCGATCTTTTGTTTCAAT  
FRD3\_SHA GATTGTTTTTTTACTGTTGGTTTCTTCTCTCGATCTTTTGTTTCAAT

FRD3\_COL TGTGTTTTTTTGGTTGTATTA AACTTAGCTCCGGATACAAAGTCAAATA  
FRD3\_BAY TGTGTTTTTTTGGTTGTATTA AACTTAGCTCCGGATACAAAGTCAAATA  
FRD3\_SHA TGTGTTTTTTTGGTTGTATTA AACTTAGCTCCGGATACAAAGTCAAATA

FRD3\_COL CCGGAAAACAAATCGAATAAAAAGGAGAAGAGGACCATTAGAACAGCATCA  
FRD3\_BAY CCGGAAAACAAATCGAATAAAAAGGAGAAGAGGACCATTAGAACAGCATCA  
FRD3\_SHA CCGGAAAACAAATCGAATAAAAAGGAGAAGAGGACCATTAGAACAGCATCA

FRD3\_COL ACAGCTATGATCTTTGGGTTAATCCTTGGCCTTTGTGCAAGCTATTTTCTT  
FRD3\_BAY ACAGCTATGATCTTTGGGTTAATCCTTGGCCTTTGTGCAAGCTATTTTCTT  
FRD3\_SHA ACAGCTATGATCTTTGGGTTAATCCTTGGCCTTTGTGCAAGCTATTTTCTT

FRD3\_COL GATTTTCAGTTCAAAGTTGCTTCTAGGCTCATGGGAGTGA AACACAGTAA  
FRD3\_BAY GATTTTCAGTTCAAAGTTGCTTCTAGGCTCATGGGAGTGA AACACAGTAA  
FRD3\_SHA GATTTTCAGTTCAAAGTTGCTTCTAGGCTCATGGGAGTGA AACACAGTAA

FRD3\_COL GTTTTCAGAAATAACATATTTTGTGGGATCTATAGCATAAAAATGTTTT  
FRD3\_BAY GTTTTCAGAAATAACATATTTTGTGGGATCTATAGCATAAAAATGTTTT  
FRD3\_SHA GTTTTCAGAAATAACATATTTTGTGGGATCTATAGCATAAAAATGTTTT

FRD3\_COL GACTAATTTGAGTTGAATTTGGATAACAGAAATTCACCAATGTTATCACCA  
FRD3\_BAY GACTAATTTGAGTTGAATTTGGATAACAGAAATTCACCAATGTTATCACCA  
FRD3\_SHA GACTAATTTGAGTTGAATTTGGATAACAGAAATTCACCAATGTTATCACCA

FRD3\_COL GCACACAAGTACTTGAGCATACGAGCTTTGGGGCTCTGCAATGCTTCT  
FRD3\_BAY GCACACAAGTACTTGAGCATACGAGCTTTGGGGCTCTGCAATGCTTCT  
FRD3\_SHA GCACACAAGTACTTGAGCATACGAGCTTTGGGGCTCTGCAATGCTTCT

Figure S6

FRD3\_COL ATCTCTTGGCTATGCAAGGCATCTTTTCGTGGATTCAAGGACACCAAAACTC  
FRD3\_BAY ATCTCTTGGCTATGCAAGGCATCTTTTCGTGGATTCAAGGACACCAAAACTC  
FRD3\_SHA ATCTCTTGGCTATGCAAGGCATCTTTTCGTGGATTCAAGGACACCAAAACTC

FRD3\_COL CTCTCTTTGCCACTGGTAATTAAGTTGTAACCTTAGATCATCTTTAATGA  
FRD3\_BAY CTCTCTTTGCCACTGGTAATTAAGTTGTAACCTTAGATCATCTTTAATGA  
FRD3\_SHA CTCTCTTTGCCACTGGTAATTAAGTTGTAACCTTAGATCATCTTTAATGA

FRD3\_COL TCACTCTCTTACTTCTTATAATA-----TTTGCCTT  
FRD3\_BAY TCACTCTCTTACTTCTTATAATAATGTTAGCTAATAATAATTTTGCCTT  
FRD3\_SHA TCACTCTCTTACTTCTTATAATAATGTTAGCTAATAATAATTTTGCCTT

FRD3\_COL AATGCGTGAACAGTCGTAGCAGATGTTATCAACATAGTTCTCGACCCCA  
FRD3\_BAY AATGCGTGAACAGTCGTAGCAGATGTTATCAACATAGTTCTCGACCCCA  
FRD3\_SHA AATGCGTGAACAGTCGTAGCAGATGTTATCAACATAGTTCTCGACCCCA

FRD3\_COL TCTTCATTTTTGTGCTTCGTCTAGGGATCATCGGTGACGCCATTGCCCAT  
FRD3\_BAY TCTTCATTTTTGTGCTTCGTCTAGGGATCATCGGTGACGCCATTGCCCAT  
FRD3\_SHA TCTTCATTTTTGTGCTTCGTCTAGGGATCATCGGTGACGCCATTGCCCAT

FRD3\_COL GTCATTTCTCAGTAAGAGAAATCACTAAAAAATCCACACATGCAAAAG  
FRD3\_BAY GTCATTTCTCAGTAAGAGAAATCACTAAAAAATCCACACATGCAAAAG  
FRD3\_SHA GTCATTTCTCAGTAAGAGAAATCACTAAAAAATCCACACATGCAAAAG

FRD3\_COL TGATCATTATGAACAAAATCGTAGGCGCACTCTTGTTTTCTACAGCT  
FRD3\_BAY TGATCATTATGAACAAAATCGTAGGCGCACTCTTGTTTTCTACAGCT  
FRD3\_SHA TGATCATTATGAACAAAATCGTAGGCGCACTCTTGTTTTCTACAGCT

FRD3\_COL ATAAATAGACTTGTGAAGTCATAACCTCAACAAAAAATAATGATTTGTT  
FRD3\_BAY ATAAATAGACTTGTGAAGTCATAACCTCAACAAAAAATAATGATTTGTT  
FRD3\_SHA ATAAATAGACTTGTGAAGTCATAACCTCAACAAAAAATAATGATTTGTT

FRD3\_COL TGTGTACGTGAAGTACTTTCATGACTCTAATATTTGTCGCTTCTCCGCA  
FRD3\_BAY TGTGTACGTGAAGTACTTTCATGACTCTAATATTTGTCGCTTCTCCGCA  
FRD3\_SHA TGTGTACGTGAAGTACTTTCATGACTCTAATATTTGTCGCTTCTCCGCA

FRD3\_COL AAGAAAGTTAATTTGATTTCCACCAAACTTCGGGGATTGACAGTTGGAAG  
FRD3\_BAY AAGAAAGTTAATTTGATTTCCACCAAACTTCGGGGATTGACAGTTGGAAG  
FRD3\_SHA AAGAAAGTTAATTTGATTTCCACCAAACTTCGGGGATTGACAGTTGGAAG

FRD3\_COL GTTCTTAAAAATGTCAGTATGGATGCATATTTATAAAGTTGTGGTT  
FRD3\_BAY GTTCTTAAAAATGTCAGTATGGATGCATATTTATAAAGTTGTGGTT  
FRD3\_SHA GTTCTTAAAAATGTCAGTATGGATGCATATTTATAAAGTTGTGGTT

FRD3\_COL CTTGCAATAAATTTTTTTTT-AAAAACAAGATCCGTCGTAGGACTAAT  
FRD3\_BAY CTTGCAATAAATTTTTTTTT-AAAAACAAGATCCGTCGTAGGACTAAT  
FRD3\_SHA CTTGCAATAAATTTTTTTTT-AAAAACAAGATCCGTCGTAGGACTAAT

FRD3\_COL GCACAGAGTCCAAAAATAAATAAACAATAAATAATCTATATAATAATAG  
FRD3\_BAY GCACAGAGTCCAAAAATAAATAAACAATAAATAATCTATATAATAATAG  
FRD3\_SHA GCACAGAGTCCAAAAATAAATAAACAATAAATAATCTATATAATAATAG

FRD3\_COL AATTCAAATCAAAATAAGTCTATATTTAAAAATATGAATATTTGAAATAT  
FRD3\_BAY AATTCAAATCAAAATAAGTCTATATTTAAAAATATGAATATTTGAAATAT  
FRD3\_SHA AATTCAAATCAAAATAAGTCTATATTTAAAAATATGAATATTTGAAATAT

FRD3\_COL ATAGTTAAGAAAATGAGAAAATGGATATATGTCTAACAAAGTATAGTATT  
FRD3\_BAY ATAGTTAAGAAAATGAGAAAATGGATATATGTCTAACAAAGTATAGTATT  
FRD3\_SHA ATAGTTAAGAAAATGAGAAAATGGATATATGTCTAACAAAGTATAGTATT

FRD3\_COL AAAAAAGAAAGGGCTACTATTGCTGGCGAGGACCATAGCAGTACGCTTTT  
FRD3\_BAY AAAAAAGAAAGGGCTACTATTGCTGGCGAGGACCATAGCAGTACGCTTTT  
FRD3\_SHA AAAAAAGAAAGGGCTACTATTGCTGGCGAGGACCATAGCAGTACGCTTTT

FRD3\_COL GTCAGACCTTAGCAGCAGCAATGGCGGCGCGCTGGGTACAACACCAATG  
FRD3\_BAY GTCAGACCTTAGCAGCAGCAATGGCGGCGCGCTGGGTACAACACCAATG  
FRD3\_SHA GTCAGACCTTAGCAGCAGCAATGGCGGCGCGCTGGGTACAACACCAATG

FRD3\_COL GCTGCTTTTCAGATTTGTTTACAAGTATGGTTAACTTCTCTCTCTCAA  
FRD3\_BAY GCTGCTTTTCAGATTTGTTTACAAGTATGGTTAACTTCTCTCTCTCAA  
FRD3\_SHA GCTGCTTTTCAGATTTGTTTACAAGTATGGTTAACTTCTCTCTCTCAA

FRD3\_COL TGATGGTCTTCCGCTTGGTTCAGGTAATCATGTTTTCTCGTTGTATTA  
FRD3\_BAY TGATGGTCTTCCGCTTGGTTCAGGTAATCATGTTTTCTCGTTGTATTA  
FRD3\_SHA TGATGGTCTTCCGCTTGGTTCAGGTAATCATGTTTTCTCGTTGTATTA

FRD3\_COL ATTTATGTATAGTTTATATGTTGATCAAGTTGATGTAGAAAATGATCA  
FRD3\_BAY ATTTATGTATAGTTTATATGTTGATCAAGTTGATGTAGAAAATGATCA  
FRD3\_SHA ATTTATGTATAGTTTATATGTTGATCAAGTTGATGTAGAAAATGATCA

FRD3\_COL TTCAATACGTTGCAGGCGATTTCTGGCTTGTGCTGAGAAAGGACTA  
FRD3\_BAY TTCAATACGTTGCAGGCGATTTCTGGCTTGTGCTGAGAAAGGACTA  
FRD3\_SHA TTCAATACGTTGCAGGCGATTTCTGGCTTGTGCTGAGAAAGGACTA

FRD3\_COL TAACAAAGTACTGCTGTTGCATCCCGTGTCTACAGGTTCCGGTCCAAAA  
FRD3\_BAY TAACAAAGTACTGCTGTTGCATCCCGTGTCTACAGGTTCCGGTCCAAAA  
FRD3\_SHA TAACAAAGTACTGCTGTTGCATCCCGTGTCTACAGGTTCCGGTCCAAAA

FRD3\_COL ATCACATTACCAAACTTTCTTTAAAAATAAATAAATTTGTAACATAAAA  
FRD3\_BAY ATCACATTACCAAACTTTCTTTAAAAATAAATAAATTTGTAACATAAAA  
FRD3\_SHA ATCACATTACCAAACTTTCTTTAAAAATAAATAAATTTGTAACATAAAA

FRD3\_COL CAGAAATGAATTTGATACGCAGATGGGTTTTGTGTTAGGACTTTGGACTGT  
FRD3\_BAY CAGAAATGAATTTGATACGCAGATGGGTTTTGTGTTAGGACTTTGGACTGT  
FRD3\_SHA CAGAAATGAATTTGATACGCAGATGGGTTTTGTGTTAGGACTTTGGACTGT

FRD3\_COL CCGTTTTTGTGGACTAGGCTCTACTTTGGTGGCGGAGTTTCTCCAAG  
FRD3\_BAY CCGTTTTTGTGGACTAGGCTCTACTTTGGTGGCGGAGTTTCTCCAAG  
FRD3\_SHA CCGTTTTTGTGGACTAGGCTCTACTTTGGTGGCGGAGTTTCTCCAAG

FRD3\_COL GACCCCTGCTGTTATTACCTCATGGCCATCGGAATACCGGTAACATAATA  
FRD3\_BAY GACCCCTGCTGTTATTACCTCATGGCCATCGGAATACCGGTAACATAATA  
FRD3\_SHA GACCCCTGCTGTTATTACCTCATGGCCATCGGAATACCGGTAACATAATA

FRD3\_COL TCAAAATAAATACTATAGTATAAAAAATCAATTTAAAAAGAAATTTACTA  
FRD3\_BAY TCAAAATAAATACTATAGTATAAAAAATCAATTTAAAAAGAAATTTACTA  
FRD3\_SHA TCAAAATAAATACTATAGTATAAAAAATCAATTTAAAAAGAAATTTACTA

FRD3\_COL ATGAGAAGAGGTTATATATATTTTATGCGATTTTATAGCAGCAACGCGCCA  
FRD3\_BAY ATGAGAAGAGGTTATATATATTTTATGCGATTTTATAGCAGCAACGCGCCA  
FRD3\_SHA ATGAGAAGAGGTTATATATATTTTATGCGATTTTATAGCAGCAACGCGCCA

FRD3\_COL ATAAACTCTCTCGCCTTTGATTTGGATGGAGTCAATTTGGAGCATCTGA  
FRD3\_BAY ATAAACTCTCTCGCCTTTGATTTGGATGGAGTCAATTTGGAGCATCTGA  
FRD3\_SHA ATAAACTCTCTCGCCTTTGATTTGGATGGAGTCAATTTGGAGCATCTGA

FRD3\_COL TTTTGTCTTACACTGCATACTCCATGGTATGCACACTATATATACTATGAA  
FRD3\_BAY TTTTGTCTTACACTGCATACTCCATGGTATGCACACTATATATACTATGAA  
FRD3\_SHA TTTTGTCTTACACTGCATACTCCATGGTATGCACACTATATATACTATGAA

FRD3\_COL ATGATTAATAATTCCTTTTTTTTTTTTTTTTGAATGACTTAAACTTTGTCTAT  
FRD3\_BAY ATGATTAATAATTCCTTTTTTTTTTTTTTTTGAATGACTTAAACTTTGTCTAT  
FRD3\_SHA ATGATTAATAATTCCTTTTTTTTTTTTTTTTGAATGACTTAAACTTTGTCTAT

FRD3\_COL CTTTTTTTCTGTAATCCAATATGATAAATCAGTGGGAGTGGCGGCCA  
FRD3\_BAY CTTTTTTTCTGTAATCCAATATGATAAATCAGTGGGAGTGGCGGCCA  
FRD3\_SHA CTTTTTTTCTGTAATCCAATATGATAAATCAGTGGGAGTGGCGGCCA

FRD3\_COL TAAGCATTCAGCAGTAATAATATATGGAAGCAATGGTTTTCATAGGA  
FRD3\_BAY TAAGCATTCAGCAGTAATAATATATGGAAGCAATGGTTTTCATAGGA  
FRD3\_SHA TAAGCATTCAGCAGTAATAATATATGGAAGCAATGGTTTTCATAGGA

FRD3\_COL ATATGGATAGCTCTTACAATCTATATGGCTCTCCGGGCTATTACTGGAAT  
FRD3\_BAY ATATGGATAGCTCTTACAATCTATATGGCTCTCCGGGCTATTACTGGAAT  
FRD3\_SHA ATATGGATAGCTCTTACAATCTATATGGCTCTCCGGGCTATTACTGGAAT

FRD3\_COL TGCCAGGTATTTAAATTTGGGCTT-----TACTATAGCCCACT  
FRD3\_BAY TGCCAGGTATTTAAATTTGGGCTT-----TACTATAGCCCACT  
FRD3\_SHA TGCCAGGTATTTAAATTTGGGCTT-----TACTATAGCCCACT

FRD3\_COL ATAGTAGAAGCAGTATTGACTGAGTGTGAAATTTATGAGGATGGCGA  
FRD3\_BAY ATAGTAGAAGCAGTATTGACTGAGTGTGAAATTTATGAGGATGGCGA  
FRD3\_SHA ATAGTAGAAGCAGTATTGACTGAGTGTGAAATTTATGAGGATGGCGA

FRD3\_COL CAGGAACCTGGACCTGGAGGTTCTTGGCTGGACCATCTCTCTTCTCATCT  
FRD3\_BAY CAGGAACCTGGACCTGGAGGTTCTTGGCTGGACCATCTCTCTTCTCATCT  
FRD3\_SHA CAGGAACCTGGACCTGGAGGTTCTTGGCTGGACCATCTCTCTTCTCATCT

FRD3\_COL TCCTAGGACTTAGTATTTATAACGAGTTCATCTCTCTCTCTCTCTC  
FRD3\_BAY TCCTAGGACTTAGTATTTATAACGAGTTCATCTCTCTCTCTCTCTC  
FRD3\_SHA TCCTAGGACTTAGTATTTATAACGAGTTCATCTCTCTCTCTCTCTC

FRD3\_COL GTTTTTGTTTTATGGTCTTGTGTTTTTTTTTCAACATTTTGTTCGAGAGA  
FRD3\_BAY GTTTTTGTTTTATGGTCTTGTGTTTTTTTTTCAACATTTTGTTCGAGAGA  
FRD3\_SHA GTTTTTGTTTTATGGTCTTGTGTTTTTTTTTCAACATTTTGTTCGAGAGA

FRD3\_COL CCGTTATCATATTTATCAGTTTACACATAAATAATGATATTTTAAAGTCAT  
FRD3\_BAY CCGTTATCATATTTATCAGTTTACACATAAATAATGATATTTTAAAGTCAT  
FRD3\_SHA CCGTTATCATATTTATCAGTTTACACATAAATAATGATATTTTAAAGTCAT

FRD3\_COL TAAATATGGAGCCCTCTGCCCCCTACTGGCTTTTCTACCAAAATAGAATA  
FRD3\_BAY TAAATATGGAGCCCTCTGCCCCCTACTGGCTTTTCTACCAAAATAGAATA  
FRD3\_SHA TAAATATGGAGCCCTCTGCCCCCTACTGGCTTTTCTACCAAAATAGAATA

FRD3\_COL TTTCTGAT--GAGTATGTTTTCAGCTAGACTAGATGGTTCAAGATATCCGG  
FRD3\_BAY TTTCTGAT--GAGTATGTTTTCAGCTAGACTAGATGGTTCAAGATATCCGG  
FRD3\_SHA TTTCTGAT--GAGTATGTTTTCAGCTAGACTAGATGGTTCAAGATATCCGG

FRD3\_COL TGTCCAAGTGTGATTTGGTGTGGTTAAAAAAAATGTAAGAAAAAAAAG  
FRD3\_BAY TGTCCAAGTGTGATTTGGTGTGGTTAAAAAAAATGTAAGAAAAAAAAG  
FRD3\_SHA TGTCCAAGTGTGATTTGGTGTGGTTAAAAAAAATGTAAGAAAAAAAAG

FRD3\_COL CTGGATCTTATCCTTTTACTAAAAGAAATCTGACCAAGTATTTCTCTTA  
FRD3\_BAY CTGGATCTTATCCTTTTACTAAAAGAAATCTGACCAAGTATTTCTCTTA  
FRD3\_SHA CTGGATCTTATCCTTTTACTAAAAGAAATCTGACCAAGTATTTCTCTTA

FRD3\_COL GTTAAGGCCAAAATTAGGCTCAGATTTTAAATTAATGAACCATAGATT  
FRD3\_BAY GTTAAGGCCAAAATTAGGCTCAGATTTTAAATTAATGAACCATAGATT  
FRD3\_SHA GTTAAGGCCAAAATTAGGCTCAGATTTTAAATTAATGAACCATAGATT

FRD3\_COL TGTCTTACTCAATTTCTATGTATTTTAAATGTTTCACTTCTAAAAGTG  
FRD3\_BAY TGTCTTACTCAATTTCTATGTATTTTAAATGTTTCACTTCTAAAAGTG  
FRD3\_SHA TGTCTTACTCAATTTCTATGTATTTTAAATGTTTCACTTCTAAAAGTG

FRD3\_COL TTTTCTAAAAGTTTTCAACTATGACTTCAACTCTTAAAGCTGTTTTTAA  
FRD3\_BAY TTTTCTAAAAGTTTTCAACTATGACTTCAACTCTTAAAGCTGTTTTTAA  
FRD3\_SHA TTTTCTAAAAGTTTTCAACTATGACTTCAACTCTTAAAGCTGTTTTTAA

FRD3\_COL TGAATCCAAAATTTACACTTTAATTCAAATTTTCAACTTGTGATTAACAA  
FRD3\_BAY TGAATCCAAAATTTACACTTTAATTCAAATTTTCAACTTGTGATTAACAA  
FRD3\_SHA TGAATCCAAAATTTACACTTTAATTCAAATTTTCAACTTGTGATTAACAA

FRD3\_COL ATAATTATACTTTATAGGTATTAATTTCTTGCACCTTTTTGGAATG  
FRD3\_BAY ATAATTATACTTTATAGGTATTAATTTCTTGCACCTTTTTGGAATG  
FRD3\_SHA ATAATTATACTTTATAGGTATTAATTTCTTGCACCTTTTTGGAATG

Figure S6. Continued
