# Supplementary material for: Natural Variation at the FRD3 MATE Transporter Locus Reveals Cross-Talk between Fe Homeostasis and Zn Tolerance in Arabidopsis thaliana
Source: PubMed Central journal article supplement (PMC3516540; doi:10.1371/journal.pgen.1003120), 2012-12-06
Supplement: pgen.1003120.s014.pdf [file pgen.1003120.s014.pdf]

Table S1. QTL analyses

| QTL  | Trait <sup>a</sup>   | Chromosome | QTL position (cM) <sup>b</sup> | Marker <sup>c</sup> | LOD score | R <sup>2</sup> value <sup>d</sup> | a <sup>e</sup> |
|------|----------------------|------------|--------------------------------|---------------------|-----------|-----------------------------------|----------------|
| ZnT1 | RelPR <sub>150</sub> | 1          | 55.6                           | F5I14               | 5.99      | 12                                | 3.66           |
| ZnT2 | RelPR <sub>150</sub> | 3          | 6.0                            | ATHCHIB2            | 14.1      | 29                                | 5.58           |
| ZnT3 | RelPR <sub>150</sub> | 5          | 51.2                           | MSAT5.9             | 6.94      | 16                                | 4.13           |

- Relative variation of the Primary Root length between 150  $\mu$ M Zn and control condition (RelPR<sub>150</sub>)
- The position of the QTL is expressed in cM from the 1st marker of the chromosome
- Name of the closest marker, according to the initial mapping approach
- Percentage of variance explained by the QTL
- Additive effect. Positive value indicates that for the three QTLs, the presence of the Sha allele at QTL decreases root length in the presence of Zn.
