# Supplementary material for: Natural Variation at the FRD3 MATE Transporter Locus Reveals Cross-Talk between Fe Homeostasis and Zn Tolerance in Arabidopsis thaliana
Source: PubMed Central journal article supplement (PMC3516540; doi:10.1371/journal.pgen.1003120), 2012-12-06
Supplement: pgen.1003120.s015.pdf [file pgen.1003120.s015.pdf]

Table S2. Haplotypes and phenotypes of *A. thaliana* accessions genotyped at *FRD3*

| Name           | Haplotype <sup>a</sup> | IC50 <sup>b</sup> | AV code <sup>c</sup> | NASC code <sup>d</sup> | Name        | Haplotype | IC50 | AV code | NASC code |
|----------------|------------------------|-------------------|----------------------|------------------------|-------------|-----------|------|---------|-----------|
| 9481B          | Sha                    | 191               | 261AV                | CS22460                | Mh-0        | Col       |      | 175AV   | N904      |
| Abd-0          | Ita                    |                   | 177AV                | N932                   | Mh-1        | Col       | 193* | 215AV   | N1368     |
| Akita          | Ita                    | 189*              | 252AV                | -                      | Mir-0       | Col       |      | 216AV   | N1378     |
| Alc-0          | Cvi                    | 142*              | 178AV                | N1656                  | Ms-0        | Ita       |      | 93AV    | N905      |
| Altai-2        | Cvi                    |                   | 547AV                | -                      | Mt-0        | Ita       | 144* | 94AV    | N1380     |
| Altai-5        | Cvi                    |                   | 548AV                | -                      | N10         | Ita       |      | 265AV   | CS22488   |
| An-1           | Ita                    |                   | 96AV                 | N944                   | N13         | Col       | 146* | 266AV   | CS22491   |
| Anz-1a         | Col                    |                   | 705AV                |                        | N14         | Col       |      | 267AV   | CS22492   |
| Bay-0          | Bay                    | 165*              | 41AV                 | N954                   | N15         | Ita       |      | 268AV   | CS22493   |
| Bik-1          | Col                    |                   | 541AV                | -                      | N4          | Col       |      | 260AV   | CS22482   |
| Bik-7          | Cvi                    |                   | 543AV                | -                      | N6          | Ita       |      | 262AV   | CS22484   |
| Bl-1           | Ita                    | 128*              | 42AV                 | N968                   | N7          | Col       |      | 263AV   | CS22485   |
| Bla-1          | Ita                    |                   | 76AV                 | N970                   | N8          | Ita       |      | 264AV   | CS22486   |
| Blh-1          | Cvi                    | 159*              | 180AV                | N1030                  | Nd-1        | Bay       |      | 220AV   | N1636     |
| Br-0           | Ita                    |                   | 60AV                 | N994                   | Neo-3       | Sha       |      | 539AV   | -         |
| Bur-0          | Col                    | 195*              | 172AV                | N1028                  | Néo-6       | Sha       |      | 540AV   | -         |
| C24            | Ita                    |                   | 183AV                | N906                   | Niigata     | Ita       |      | 255AV   | -         |
| Can-0          | Bay                    | 170*              | 163AV                | N1064                  | No-0        | Bay       |      | 49AV    | N3081     |
| Chi-0          | Ita                    |                   | 89AV                 | N1072                  | Ost-0       | Col       |      | 61AV    | N1430     |
| Co-4           | Bay                    |                   | 174AV                | N1090                  | Oy-0        | Col       | 166* | 224AV   | N1436     |
| Col-0          | Col                    | 193*              | 186AV                | N1092                  | Pa-1        | Ita       |      | 50AV    | N1438     |
| Ct-1           | Bay                    | 155*              | 162AV                | N1094                  | Per-1       | Ita       |      | 100AV   | N1444     |
| Cvi-0          | Cvi                    | 149*              | 166AV                | N902                   | Petergof    | Ita       |      | 226AV   | N926      |
| Db-1           | Col                    |                   | 132AV                | N1102                  | Pi-0        | Ita       |      | 40AV    | N1454     |
| Dja-1          | Cvi                    |                   | 534AV                | -                      | Pyl-1       | Ita       | 206* | 8AV     | -         |
| Dja-5          | Cvi                    |                   | 535AV                | -                      | Qar-8a      | Col       |      | 549AV   | -         |
| Dr-0           | Ita                    |                   | 51AV                 | N1114                  | Rak-2       | Ita       |      | 228AV   | N1484     |
| Dra-0          | Col                    |                   | 194AV                | N1116                  | Ran         | Col       |      | 21AV    | -         |
| Edi-0          | Bay                    | 154*              | 83AV                 | N1122                  | Ri-0        | Ita       |      | 160AV   | N1492     |
| Enkheim-T      | Ita                    |                   | 197AV                | N921                   | Rld-2       | Col       |      | 229AV   | N1641     |
| Est-0          | Ita                    |                   | 71AV                 | N1148                  | Rsch-4      | Ita       |      | 90AV    | N1494     |
| Fl-1           | Col                    |                   | 199AV                | N1160                  | Rubezhnoe-1 | Cvi       | 137  | 231AV   | N927      |
| Ge-0           | Ita                    |                   | 101AV                | N1186                  | Sah-0       | Ita       |      | 233AV   | N1500     |
| Gr-3           | Col                    |                   | 58AV                 | N1202                  | Sakata      | Ita       | 190* | 257AV   | -         |
| Gre-0          | Bay                    | 154*              | 200AV                | N1210                  | Sap-0       | Bay       |      | 234AV   | N1506     |
| Had-1b         | Cvi                    |                   | 544AV                | -                      | Sav-0       | Ita       |      | 235AV   | N1514     |
| Hiroshima      | Sha                    | 187               | 254AV                | -                      | Shahdara    | Sha       | 136* | 236AV   | N929      |
| Hodja-Obi-Garm | Cvi                    | 128               | 203AV                | CS922                  | Sorbo       | Ita       |      | 238AV   | CS931     |
| Ishikawa       | Sha                    | 133               | 253AV                | -                      | Sp-0        | Col       |      | 53AV    | N1530     |
| Ita-0          | Ita                    | 151*              | 157AV                | N1244                  | St-0        | Bay       | 154* | 62AV    | N1534     |
| Jea            | Col                    | 166*              | 25AV                 | -                      | Stw-0       | Sha       | 139* | 92AV    | N1538     |
| Jl-3           | Ita                    |                   | 205AV                | N1252                  | Sus-1       | Cvi       |      | 533AV   | -         |
| Jm-0           | Col                    |                   | 206AV                | N1258                  | Ta-0        | Col       |      | 56AV    | N1548     |
| Ka-0           | Col                    |                   | 55AV                 | N1266                  | Te-0        | Ita       |      | 68AV    | N1550     |
| Kar-1          | Cvi                    |                   | 531AV                | -                      | Tokushima   | Ita       |      | 258AV   | -         |
| Kar-2          | Cvi                    |                   | 532AV                | -                      | Tsu-0       | Ita       | 128* | 91AV    | N1564     |
| Kas-1          | Ita                    |                   | 108AV                | N903                   | WestKar-3   | Cvi       |      | 709AV   |           |
| Kin-0          | Ita                    |                   | 209AV                | N1272                  | WestKar-4   | Cvi       |      | 710AV   |           |
| Kn-0           | Ita                    | 145*              | 70AV                 | N1286                  | Wil-1       | Col       |      | 72AV    | N1594     |
| Ko-2           | Bay                    |                   | 46AV                 | N1288                  | Ws          | Ita       |      | 244AV   | -         |
| Kondara        | Cvi                    | 158               | 190AV                | N916                   | Ws-0        | Bay       |      | 84AV    | N915      |
| Kyr-1          | Cvi                    |                   | 538AV                | -                      | Yo-0        | Ita       |      | 250AV   | N1622     |
| Ldv-5          | Col                    |                   | 11AV                 | -                      | Zal-1       | Cvi       |      | 536AV   | -         |
| Ler-1          | Ita                    |                   | 213AV                | N1642                  | Zal-3       | Cvi       |      | 537AV   | -         |
| Lip-0          | Ita                    |                   | 63AV                 | N1336                  |             |           |      |         |           |

- Representative haplotype according to Figure S7
- Inhibitory concentration 50 ( $\mu$ M) determined as the Zn concentration that reduced primary root length to 50% of control. Stars refer to data from reference [16].
- Accession number according to INRA Versailles Genomic Resource Centre (<http://dbsgap.versailles.inra.fr/vnat/>)
- Accession number according to NASC, European Arabidopsis Stock Centre (<http://arabidopsis.info>)
