# Supplementary material for: Natural Variation at the FRD3 MATE Transporter Locus Reveals Cross-Talk between Fe Homeostasis and Zn Tolerance in Arabidopsis thaliana
Source: PubMed Central journal article supplement (PMC3516540; doi:10.1371/journal.pgen.1003120), 2012-12-06
Supplement: pgen.1003120.s016.pdf [file pgen.1003120.s016.pdf]

Table S3. Segregation analysis of the Fe overaccumulation trait in the F2 plants issuing from a cross between Shahdara and *frd3-7*.

| Genotype <sup>a</sup>                                   | Number of plants showing                     |                                    | $\chi_2$ test <sup>c</sup> |
|---------------------------------------------------------|----------------------------------------------|------------------------------------|----------------------------|
|                                                         | Fe overaccumulation<br>in stele <sup>b</sup> | No Fe overaccumulation<br>in stele |                            |
| All F2 plants                                           | 14                                           | 44                                 | 0.02                       |
| <i>frd3/frd3</i>                                        | 9                                            | 2                                  |                            |
| <i>frd3/FRD3</i> <sup>Sha</sup>                         | 5                                            | 34                                 |                            |
| <i>FRD3</i> <sup>Sha</sup> / <i>FRD3</i> <sup>Sha</sup> | 0                                            | 8                                  |                            |

a. Genotype determined for the presence or absence of T-DNA using primers LBb1 and FRD3exon12R or FRD3exon7F and FRD3exon12R, respectively.

b. Fe overaccumulation is visualized by Perls' stain [21] of intact roots of plants grown on compost for 3 weeks.

c.  $\chi_2$  analysis of the segregation of Fe overaccumulation trait in the F2 progeny, H0 hypothesis was that this trait is under the control of one monogenic recessive locus.
