# Supplementary material for: Natural Variation at the FRD3 MATE Transporter Locus Reveals Cross-Talk between Fe Homeostasis and Zn Tolerance in Arabidopsis thaliana
Source: PubMed Central journal article supplement (PMC3516540; doi:10.1371/journal.pgen.1003120), 2012-12-06
Supplement: pgen.1003120.s017.pdf [file pgen.1003120.s017.pdf]

Table S4. List of markers

| Name                         | Position <sup>a</sup> | Type <sup>b</sup> | RE <sup>c</sup> | Forward (5'-3')          | Reverse (5'-3')           |
|------------------------------|-----------------------|-------------------|-----------------|--------------------------|---------------------------|
| NGA172                       | 786 400               | MSAT              |                 | AGCTGCTTCCTTATAGCGTCC    | CATCCGAATGCCATTGTTC       |
| MSAT302422                   | 2 422 445             | MSAT              |                 | CGGAATTAAGAACCGAATTGA    | ACAGGAAGGCTTCTGGGAAT      |
| MSAT302503                   | 2 503 754             | MSAT              |                 | TTGTTGATTGCCCAATTTT      | AAGGAATGAAATGATACATTTGGAA |
| CAPS2524188                  | 2 524 188             | CAPS              | TaqI            | CAACTCCGGCAGTGATTTTG     | AACCAATGACGCTTTTCCAGA     |
| CAPS2533212                  | 2 533 212             | CAPS              | StuI            | TGCTCCCTGCTCGTTAAGT      | TGGGAAGATATGCTGCTGAA      |
| CAPS2557387                  | 2 557 387             | CAPS              | Hpy188I         | TGAAGCTGAAGCTTGGGAAT     | TACCGCAAAAAGCAAAAAGAGG    |
| CAPS2560983                  | 2 560 983             | CAPS              | MnlI            | CAACTCCATGAACTCCAATGAA   | GATGAATTGCGGAGGAAG        |
| CAPS2564930                  | 2 564 930             | CAPS              | Hinfl           | ACGCTGTCGCCATTAAGAG      | GAACCAAAGTGAACCAAAAAACA   |
| IND302567 in12 <sup>d</sup>  | 2 566 751             | INDEL             |                 | ATATGGCTCTCCGGGCTATT     | ATGATCGTCCACGCAAGAAC      |
| CAPS302569 <sup>d</sup>      | 2 568 974             | CAPS              | BsrI            | AGCTTTGGCTTTAGCTGCTG     | CGGAATTTACCTGGAGGTTG      |
| IND302570 del27 <sup>d</sup> | 2 569 837             | INDEL             |                 | CGAGTAAAAGTTCACGAAAACCA  | CCGTCCAAACTTAAGACACCA     |
| IND302570 del28 <sup>d</sup> | 2 570 150             | INDEL             |                 | TTCTATACCAAATTAACCCGAAAA | TTCTATTTTTCTTTGATATTTTCCA |
| SNP2579477                   | 2 579 477             | SNP               |                 | TGTTTCGACAAGTCTACCATGAAA | TTCTGTTTGTGGTCAACGATT     |
| CAPS2587730                  | 2 587 730             | CAPS              | RsaI            | GGCAACATTTGGGCATACAT     | GGCTCTAGAACTTGCCTGGA      |
| CAPS2619300                  | 2 619 300             | CAPS              | AluI            | ATGTGGTGCCATCTGTAGCC     | ACCCGTAGTTGCTTCCACAC      |
| CER464947                    | 3 109 833             | MSAT              |                 | CTCACCTTGCTGGAGTCCG      | GTAAAGGTTTAGGCAGAGTGTG    |
| ATHCHIB2                     | 3 963 350             | MSAT              |                 | GGATCCAAGTGCTCATATATAC   | CTTTCGTTTCTAAAATATGAGAAGC |
| CAPS4942156                  | 4 942 156             | CAPS              | Hinfl           | TGGAAGCTCTAGAAACGATCG    | ACCACCTAAACCGAGAATTGG     |
| CAPS7012599                  | 7 125 259             | CAPS              | ClaI            | CACCTAACAGTTCACACCAA     | CCTTGATTTCCCTACAACAG      |
| MSAT3.19                     | 8 808 167             | MSAT              |                 | TAATTCGATCCAATTGACAT     | TGGCTTGGCACAAAAC          |

- Position on chromosome 3 in bp.
- CAPS for Cleaved Amplified Polymorphic Sequence; INDEL for insertion or deletion; MSAT for microsatellite; SNP for Single Nucleotide Polymorphism
- RE for Restriction Enzyme used for CAPS markers
- Markers used for the haplotyping of *AtFRD3* in accessions of *A. thaliana*
