# Supplementary material for: Natural Variation at the FRD3 MATE Transporter Locus Reveals Cross-Talk between Fe Homeostasis and Zn Tolerance in Arabidopsis thaliana
Source: PubMed Central journal article supplement (PMC3516540; doi:10.1371/journal.pgen.1003120), 2012-12-06
Supplement: pgen.1003120.s018.pdf [file pgen.1003120.s018.pdf]

Table S5. List of primers

| Application       | Primer name                        | Forward (5'-3')                 | Reverse (5'-3')                  | Ref. |
|-------------------|------------------------------------|---------------------------------|----------------------------------|------|
| seq. & cloning    | FRD3_promo1F                       | TGACGTTGATGGCTTGAAAA            |                                  | a    |
| sequencing        | FRD3_promo2F                       | TTTGGACGGAAATAAAGAGCA           |                                  | a    |
| sequencing        | FRD3_exon 2F                       | GGCAGAGGAAGACACGATGG            |                                  | a    |
| sequencing        | FRD3_intron 4F                     | GCCTTAATGCGTGAAACAGTC           |                                  | a    |
| sequencing        | FRD3_exon 12R                      |                                 | TTCCTGTTGCCATCCTGCAT             | a    |
| seq. & cloning    | FRD3_post3'R                       |                                 | CATTCAAAAAAGTGCAAGGAA            | a    |
| cDNA modification | FRD3-V417I                         | TCCTTGAGAAAAATCCGGCACAA         | TTGGTGCCGGAATTTCTCCAAGGA         | a    |
| cDNA modification | FRD3-LP-NS                         | TTTCTGCATGAACAGGACTGGCTTTGTTGCT | AGCAAACAAAGCCAGTCTGTTTCATGCAGAAA | a    |
| cDNA modification | FRD3-L117P                         | ACAAAGCCAATCTGTTCATGCAGA        | TCTGCATGAACAGGATTGGCTTTGT        | a    |
| cDNA modification | FRD3-N116S                         | GCATGAACAAGACTGGCTTTGTTTG       | CAAACAAAGCCAGTCTGTTTCATGC        | a    |
| Q-RT-PCR          | AtIRT1 (At4g19690)                 | CGGTTGGACTTCTAAAATGC            | CGATAATCGACATTCCACCG             | 36   |
| Q-RT-PCR          | AtFRO2 (At1g01580)                 | GCGACTTGTAGTGC GGCTATG          | CGTTGCACGAGCGATTCTTG             | 36   |
| Q-RT-PCR          | AtFRD3 (At3g08040)                 | CGAGGACCATAGCAGTGACG            | CAGCAAACGAACAAGCCAGA             | a    |
| Q-RT-PCR          | Clathrin (At4g24550)               | AGCATACACTGCGTGCAAAG            | TCGCCTGTGTACATATCTC              | 36   |
| Q-RT-PCR          | ACT2/ACT8<br>(At3g18780/At1g49240) | GGTAACATTGTGCTCAGTGGTGG         | AACGACCTTAATCTTCATGCTGC          | 35   |
| Q-RT-PCR          | PP2A (At1g13320)                   | TAACGTGGCCAAAATGATGC            | GTTCTCCACAACCGCTTGGT             | 37   |
| Q-RT-PCR          | At5g12240                          | AGCGGCTGCTGAGAAGAAGGT           | TCTCGAAAGCCTTGCAAAATCT           | 37   |
| ASE <sup>b</sup>  | PyroSNP1-2                         | TGCTGTGGCTGGTTGGTAT             | GGAAGACACGATGGAGAAGATG           | a    |
| ASE <sup>b</sup>  | PyroSNP1-2_Seq                     | CAAGTATAGTTTCTGCATGA            |                                  | a    |
| ASE <sup>b</sup>  | PyroSNP3                           | TGCTGTGGCTGGTTGGTAT             | GGAAGACACGATGGAGAAGATG           | a    |
| ASE <sup>b</sup>  | PyroSNP3_Seq                       | GCATTTCTTCACCTACAAGT            |                                  | a    |
| ASE <sup>b</sup>  | PyroSNP4                           | CCCAAAGCTCGTATGCTCAAGT          | GCCAATCTTGTTCATGCAGAAACT         | a    |
| ASE <sup>b</sup>  | PyroSNP4_Seq                       | CGCTAGAAGCAACTT                 |                                  | a    |
| T-DNA testing     | LBb1                               | GCGTGGACCGTTGCTGCAACT           |                                  |      |
| T-DNA testing     | FRD3_exon 12R                      |                                 | TTCCTGTTGCCATCCTGCAT             | a    |
| T-DNA testing     | FRD3_exon 7F                       | CGAGGACCATAGCAGTGACG            |                                  | a    |

- a. present study  
b. ASE for Allele-Specific Expression
